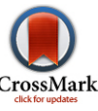

# The *Staurotypus* Turtles and Aves Share the Same Origin of Sex Chromosomes but Evolved Different Types of Heterogametic Sex Determination

Taiki Kawagoshi<sup>1</sup>, Yoshinobu Uno<sup>1</sup>, Chizuko Nishida<sup>2</sup>, Yoichi Matsuda<sup>1,3\*</sup>

**1** Laboratory of Animal Genetics, Department of Applied Molecular Biosciences, Graduate School of Bioagricultural Sciences, Nagoya University, Nagoya, Japan, **2** Department of Natural History Sciences, Faculty of Science, Hokkaido University, Sapporo, Japan, **3** Avian Bioscience Research Center, Graduate School of Bioagricultural Sciences, Nagoya University, Nagoya, Japan

## Abstract

Reptiles have a wide diversity of sex-determining mechanisms and types of sex chromosomes. Turtles exhibit temperature-dependent sex determination and genotypic sex determination, with male heterogametic (XX/XY) and female heterogametic (ZZ/ZW) sex chromosomes. Identification of sex chromosomes in many turtle species and their comparative genomic analysis are of great significance to understand the evolutionary processes of sex determination and sex chromosome differentiation in Testudines. The Mexican giant musk turtle (*Staurotypus triporcatus*, Kinosternidae, Testudines) and the giant musk turtle (*Staurotypus salvinii*) have heteromorphic XY sex chromosomes with a low degree of morphological differentiation; however, their origin and linkage group are still unknown. Cross-species chromosome painting with chromosome-specific DNA from Chinese soft-shelled turtle (*Pelodiscus sinensis*) revealed that the X and Y chromosomes of *S. triporcatus* have homology with *P. sinensis* chromosome 6, which corresponds to the chicken Z chromosome. We cloned cDNA fragments of *S. triporcatus* homologs of 16 chicken Z-linked genes and mapped them to *S. triporcatus* and *S. salvinii* chromosomes using fluorescence in situ hybridization. Sixteen genes were localized to the X and Y long arms in the same order in both species. The orders were also almost the same as those of the ostrich (*Struthio camelus*) Z chromosome, which retains the primitive state of the avian ancestral Z chromosome. These results strongly suggest that the X and Y chromosomes of *Staurotypus* turtles are at a very early stage of sex chromosome differentiation, and that these chromosomes and the avian ZW chromosomes share the same origin. Nonetheless, the turtles and birds acquired different systems of heterogametic sex determination during their evolution.

**Citation:** Kawagoshi T, Uno Y, Nishida C, Matsuda Y (2014) The *Staurotypus* Turtles and Aves Share the Same Origin of Sex Chromosomes but Evolved Different Types of Heterogametic Sex Determination. PLoS ONE 9(8): e105315. doi:10.1371/journal.pone.0105315

**Editor:** Roscoe Stanyon, University of Florence, Italy

**Received:** June 2, 2014; **Accepted:** July 18, 2014; **Published:** August 14, 2014

**Copyright:** © 2014 Kawagoshi et al. This is an open-access article distributed under the terms of the Creative Commons Attribution License, which permits unrestricted use, distribution, and reproduction in any medium, provided the original author and source are credited.

**Data Availability:** The authors confirm that all data underlying the findings are fully available without restriction. All relevant data are within the paper and its Supporting Information files.

**Funding:** This research was supported by Grants-in-Aid for Scientific Research on Innovative Areas (No. 23113004) and Scientific Research (B) (No. 22370081) from the Ministry of Education, Culture, Sports, Science, and Technology (MEXT), Japan. The funders had no role in study design, data collection and analysis, decision to publish, or preparation of the manuscript.

**Competing Interests:** The authors have declared that no competing interests exist.

\* Email: yoimatsu@agr.nagoya-u.ac.jp

## Introduction

The constitutions of sex chromosome and sex-determination systems of reptiles are extraordinarily diverse. Reptiles exhibit both genotypic sex determination (GSD)—in which the sex of offspring is determined by a sex-determining gene on the sex chromosome—and temperature-dependent sex determination (TSD)—in which the sex ratio depends on the incubation temperature of embryos. GSD systems are found in all snakes, many lizards, and a small number of turtles [1]. Almost all snakes exhibit female heterogamety (ZZ/ZW), whereas lizards and turtles with GSD exhibit both male heterogamety (XX/XY) and female heterogamety [2]. In lizards, sex chromosomes have been identified for 181 species, with 115 species shown to exhibit male heterogamety and 66 shown to exhibit female heterogamety [3]. Given that the distribution of XY and ZW species shows no clear phylogenetic segregation [3–6], it seems likely that the sex chromosomes differentiated independently in each lineage. On the other hand,

whereas 18 turtle species from the order Testudines exhibit GSD [7], differentiated sex chromosomes have been identified for only nine such species (six XX/XY species and three ZZ/ZW species) [2,7–12]. Among them, the ZW sex chromosomes of Chinese soft-shelled turtle (*Pelodiscus sinensis*, Trionychidae) have conserved linkage homology with chicken chromosome 15 [11], whereas the XY sex chromosomes of the black marsh turtle (*Siebenrockiella crassicolis*, Geoemydidae) share linkage homology with chicken chromosome 5 [12]. These results suggest that the sex chromosomes of birds and turtles differentiated from different autosomal pairs of the common ancestor of Archosauromorpha, which diverged 250–270 million years ago (MYA) [13–15]. The group Archosauromorpha contains Archosauria (diapsid amniotes whose living representatives consist of birds and crocodylians) and all other saurians that are closer to Archosauria than they are to Lepidosauria (including tuataras, lizards, snakes and amphisbaenians). However, the origins of the sex chromosomes of the other seven GSD turtle species with differentiated sex chromosomes are

still unknown. Identification of the linkage groups of the sex chromosomes and their homologies in other reptilian and avian species will improve our understanding of the evolutionary mechanisms that drive the genetic determination of sex and the differentiation of sex chromosomes in extant vertebrates.

The Mexican giant musk turtle (*Staurotypus triporcatus*, Kinosternidae) and the giant musk turtle (*Staurotypus salvinii*) inhabit the region from eastern and southern North America to Argentina and have heteromorphic X and Y sex chromosomes [16,17]. The X and Y chromosomes were only slightly different in terms of the sizes of the short arms and secondary constrictions in the two species, as determined by conventional Giemsa staining. Neither the structural differences between the X and Y chromosomes at the molecular level nor their linkage groups have been determined. The present study involved comparative mapping of functional genes for the X and Y chromosomes of *S. triporcatus* and *S. salvinii* in order to elucidate the origin and evolution of the sex chromosomes of *Staurotypus* turtles. The homology of the X chromosomes of *Staurotypus* turtles with the chicken Z chromosome was found by cross-species hybridization with chromosome paints of Chinese soft-shelled turtle (*Pelodiscus sinensis*); therefore, we isolated *S. triporcatus* homologs of 16 chicken Z-linked genes and mapped them to chromosomes of *S. triporcatus* and *S. salvinii*. Comparison of the cytogenetic maps of the X chromosomes of these two turtle species with that of the Z chromosome of the ostrich (*Struthio camelus*), which is one of the most primitive extant avian species and retains the ancestral type of avian Z chromosomes, sheds light on the differentiation of the X and Y chromosomes of *Staurotypus* turtles and the evolution of sex chromosomes in Testudines.

## Materials and Methods

### Cell culture and chromosome preparation

For each of *S. triporcatus* and *S. salvinii*, a male that had been bred in captivity was purchased and used for this study. After intra-peritoneal injection of a fatal dose of pentobarbital, the heart, lung, and mesentery were removed and used for cell culture at 26°C in a humidified atmosphere of 5% CO<sub>2</sub> in air. Animal care and all experimental procedures were approved by the Animal Experiment Committee, Graduate School of Bioagricultural Sciences, Nagoya University (approval no. 2010052401), and the experiments were conducted according to the Regulations on Animal Experiments in Nagoya University. Cell culturing and chromosome preparation were performed as described previously [12]. Fibroblasts of the ostrich used in our previous study [18] were recovered from liquid nitrogen and subsequently cultured for chromosome preparation. For gene mapping by fluorescence in situ hybridization (FISH), replication banding was performed to identify each chromosome precisely, as described previously [12,19]. The fibroblast cell cultures were treated with BrdU (12 µg/ml) (Sigma-Aldrich) at the late replication stage for 12 h, including 45 min of colcemid treatment, and chromosome preparations were made using an air-drying method. The cultured cells of the ostrich were harvested after 6 h of treatment with BrdU (25 µg/ml) under conditions of 39°C with 5% CO<sub>2</sub> in air. After staining the slides with Hoechst 33258 (1 µg/ml) for 10 min, replication bands were obtained by heating them at 65°C for 3 min and exposing them to UV light at 65°C for an additional 6.5 min. The slides were kept at -80°C until use.

### C-banding

To examine the chromosomal distribution of constitutive heterochromatin in *S. triporcatus* and *S. salvinii*, C-banding was

performed by the standard barium hydroxide/saline/Giemsa method [20] with slight modification; chromosome slides were treated with 0.2N HCl at room temperature for 5 min and then 5% Ba(OH)<sub>2</sub> at 50°C for 2 min.

### Chromosome painting

Cross-species chromosome painting with chromosome-specific DNA probes of *P. sinensis* was performed for *S. triporcatus*. The *P. sinensis* chromosome paints were prepared and provided by Fengtang Yang and Patricia O'Brien, both from the Department of Veterinary Medicine, Cambridge University, UK. Chromosome painting was performed as described previously [12,21]. One microgram of DNA probe was labeled with biotin-16-dUTP (Roche Diagnostics) using a nick translation kit (Roche Diagnostics). After pre-hybridization for 15 min at 37°C, hybridization was carried out at 37°C for five days. After hybridization, the slide was washed, incubated with fluorescein-conjugated avidin (Roche Diagnostics), and stained with 0.75 µg/ml propidium iodide (PI).

### Molecular cloning of *S. triporcatus* and ostrich homologs of chicken genes

Testis and brain of *S. triporcatus* and testis of the ostrich were homogenized and lysed with TRIzol Reagent (Life Technologies), and total RNA was extracted following the manufacturer's instructions. Testis tissues of the ostrich used in our previous study [18] were recovered from liquid nitrogen. Molecular cloning of *S. triporcatus* and ostrich homologs of the chicken Z-linked genes was performed by reverse transcription polymerase chain reaction (RT-PCR) using the PCR primers shown in Table S1. The nucleotide sequences of cDNA fragments were determined and compared as described previously [22].

### FISH mapping

FISH was performed for chromosomal localization of the 18S–28S ribosomal RNA (rRNA) genes and cDNA fragments of functional genes as described by Kawagoshi et al. [11] and Matsuda and Chapman [19]. After FISH of the rRNA genes, Ag-NOR staining was performed to visualize nucleolar organizing regions (NORs) on the same metaphase spreads following Howell and Black [23]. For chromosome mapping of functional genes, 250 ng of cDNA fragments were labeled with biotin-16-dUTP (Roche Diagnostics) by nick translation. After hybridization, the probe DNA was hybridized with goat anti-biotin antibody (Vector Laboratories), stained with Alexa Fluor 488 rabbit anti-goat IgG (H+L) conjugate (Life Technologies-Molecular Probes), and then counter-stained with 0.75 µg/ml PI.

## Results

### Karyotypes of *S. triporcatus* and *S. salvinii*

Twenty Giemsa-stained metaphase spreads of *S. triporcatus* and 18 metaphase spreads of *S. salvinii* were examined for karyotyping. The chromosome numbers were 2n = 54 in all metaphase spreads of both species, as reported previously [16]. Karyotypes of both species consisted of four pairs of large chromosomes including sex chromosomes (chromosomes 1–3 and X and Y chromosomes), seven pairs of medium-sized and/or small chromosomes (chromosomes 4–10), and 16 pairs of indistinguishable microchromosomes (Figure 1). The sex chromosomes were morphologically differentiated: whereas the X chromosomes were acrocentric in *S. triporcatus* and subtelocentric in *S. salvinii*, with a secondary constriction on the long arm near the centromere, the Y chromosomes were both acrocentric; and the size of the

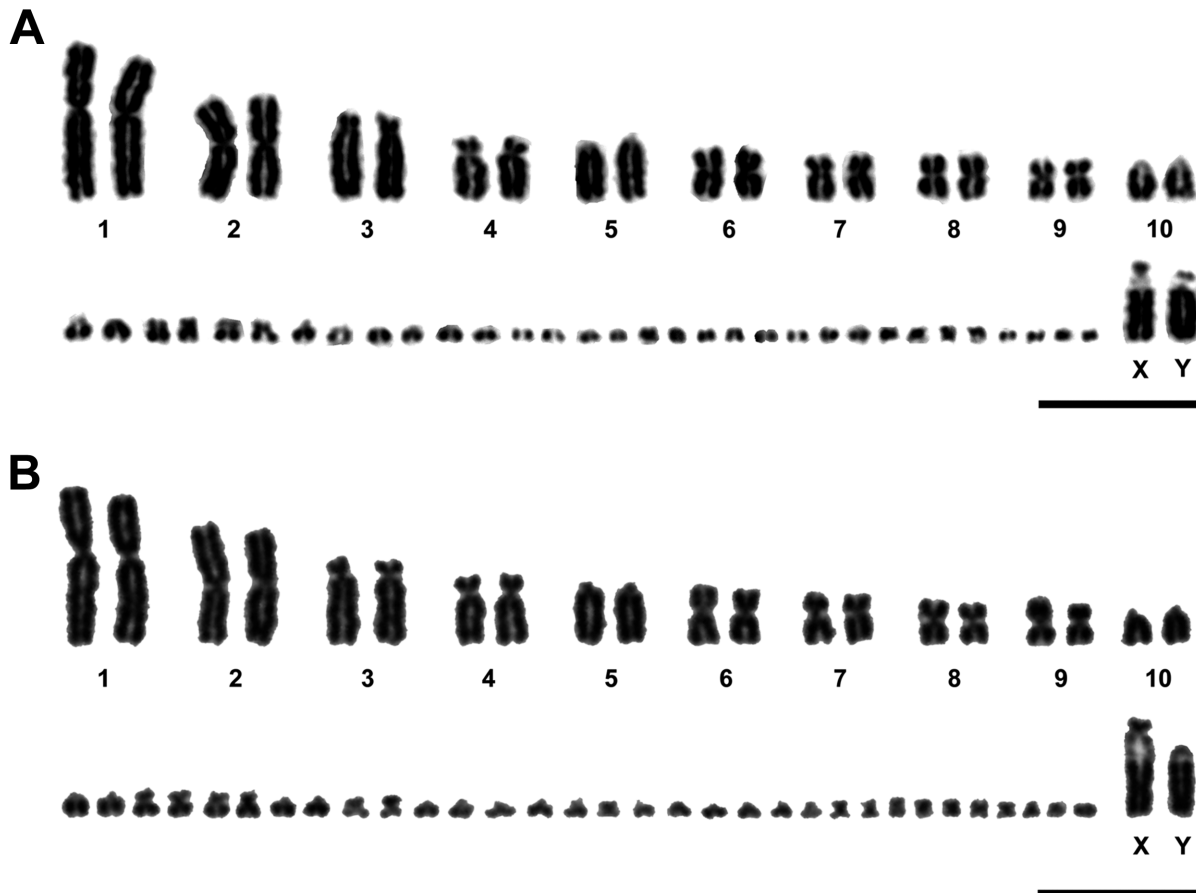

**Figure 1. Giemsa-stained karyotypes of male *S. triporcatus* and *S. salvinii*.** (A) *S. triporcatus*. (B) *S. salvinii*. The X and Y chromosomes have large and small secondary constrictions, respectively. Scale bars = 10  $\mu\text{m}$ . doi:10.1371/journal.pone.0105315.g001

secondary constriction was larger in the X chromosomes than in the Y chromosomes.

C-positive heterochromatin blocks were observed in the centromeric regions of almost all autosomes and the telomeric regions of several pairs of autosomes in both species (Figures 2A, B). Chromosomal regions surrounding the secondary constrictions on the X and Y chromosomes were heterochromatinized and showed C-positive bands in both species (Figures 2C, D).

#### Chromosomal locations of the 18S-28S rRNA genes and NORs in *S. triporcatus* and *S. salvinii*

FISH signals of the 18S-28S rRNA genes were detected in the secondary constrictions of the X and Y chromosomes, one of the copies of chromosome 2, and a pair of microchromosomes in *S. triporcatus* (Figure 3A). In *S. salvinii*, signals were detected only in the secondary constrictions of the X and Y chromosomes (Figure 3D). There was a remarkable difference in the size of hybridization signals between the X and Y chromosomes in both species, which corresponded to the difference in the size of secondary constrictions. NORs were detected in the secondary constrictions of the X and Y chromosomes in both species using Ag-NOR staining, whereas no NORs were found for chromosome 2 and a pair of microchromosomes in *S. triporcatus* (Figures 3C, F), in which small FISH signals of rRNA genes were observed (Figure 3A).

#### Chromosome homology of the *S. triporcatus* X chromosome with the chicken Z chromosome

Hybridization of the chromosome 6 paint of *P. sinensis* to the X and Y chromosomes of *S. triporcatus* (Figure 4) indicated that the *S. triporcatus* X and Y sex chromosomes are a counterpart of *P. sinensis* chromosome 6, which is homologous to the chicken Z chromosome [24,25].

#### Chromosomal locations of *S. triporcatus* homologs of chicken Z-linked genes

On the basis of the result that *S. triporcatus* X and Y sex chromosomes are homologous to the chicken Z chromosome, we cloned *S. triporcatus* homologs of 16 chicken Z-linked genes: *ACO1*, *ATP5A1*, *CHD1*, *DMRT1*, *FER*, *GHR*, *HMGCR*, *KIF2A*, *NARS*, *NFIB*, *NTRK2*, *RNF20*, *RPS6*, *SPIN*, *TMOD*, and *VCP*. Nucleotide sequence identities in the equivalent regions of cDNA fragments of these 16 genes between *S. triporcatus* and chicken ranged from 77.7% to 94.4% (Table 1). Hoechst-stained bands obtained by the replication banding method enabled precise determination of the subchromosomal locations of the genes (Figure 5). For FISH mapping, 25–30 metaphase spreads were observed for each gene. The hybridization efficiency ranged from 20% to 36% on the X chromosome, and from 23% to 38% on the Y chromosome. Sixteen homologs of chicken Z-linked genes were all localized to the long arm of *S. triporcatus* X and Y chromosomes in the same order (Figure 6).

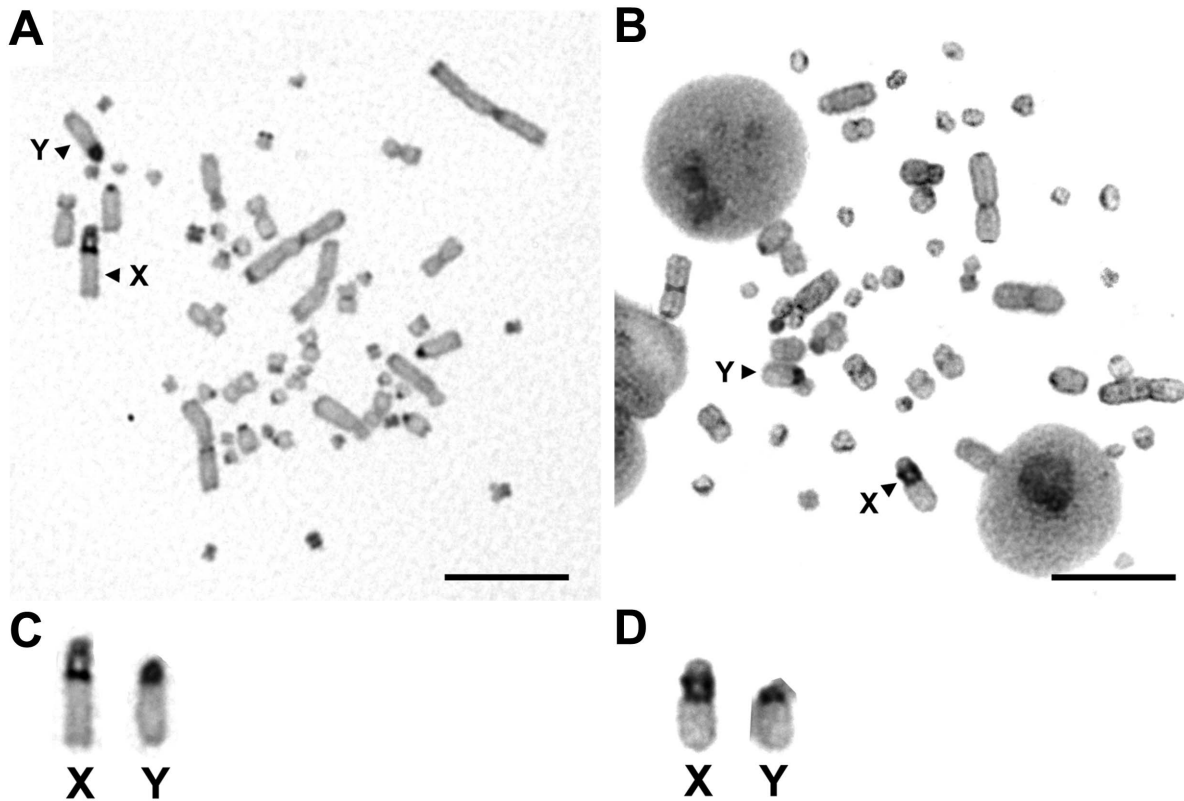

**Figure 2. C-banded metaphase spreads of male *S. triporcatus* and *S. salvinii*.** (A) *S. triporcatus*. (B) *S. salvinii*. (C, D) Enlarged photographs of the X and Y chromosomes of *S. triporcatus* (C) and *S. salvinii* (D). Scale bars = 10  $\mu\text{m}$ . doi:10.1371/journal.pone.0105315.g002

### Comparison between the *S. triporcatus* X chromosome and the ostrich Z chromosome

We cloned ostrich homologs of eight chicken Z-linked genes, *ACO1*, *FER*, *HMGCR*, *KIF2A*, *NARS*, *NFIB*, *RNF20*, and *VCP*, by RT-PCR using the PCR primers shown in Table S1 and mapped them to ostrich chromosomes by FISH (Figure S1). Although *ACO1* (*IREBPI*) was previously mapped to the ostrich Z chromosome [26,27], we cloned a cDNA fragment of this gene and mapped it to determine its precise location on the ostrich Z chromosome. We also mapped *DMRT1* to ostrich chromosomes using the cDNA fragments isolated in our previous study [18]. We then constructed a cytogenetic map of the ostrich Z and W chromosomes with 16 functional genes by adding seven ostrich Z-linked genes (*ATP5A1*, *CHD1*, *GHR*, *NTRK2*, *RPS6*, *SPIN*, and *TMOD*), which were cloned and mapped in our previous studies (Figure S2) [18,27]. Nucleotide sequence identities in the equivalent regions of cDNA fragments of 16 genes ranged from 79.6% to 94.4% between *S. triporcatus* and the ostrich (Table 2). In general, the identities of nucleotide sequences were higher in 14 genes than in those between *S. triporcatus* and chicken; exceptions were for *NFIB* and *VCP*, for which the nucleotide sequence identities did not differ (Tables 1 and 2). Eleven genes (*RPS6*, *NTRK2*, *SPIN*, *FER*, *CHD1*, *HMGCR*, *KIF2A*, *GHR*, *ATP5A1*, *NARS*, and *VCP*) were localized to the ostrich Z and W chromosomes in the same order, whereas five genes (*TMOD*, *ACO1*, *RNF20*, *DMRT1*, and *NFIB*) were not mapped to the W chromosome (Figure S2). This indicated that the proximal region of the ostrich Z chromosome that contained these five genes had been deleted in the W chromosome. The order of 16 genes on the ostrich Z chromosome was almost the same as those on the X and

Y chromosomes of *S. triporcatus* (Figure 6), although the precise order among several genes located close together was not determined.

### Comparison of the XY chromosomes between *S. triporcatus* and *S. salvinii*

Sixteen genes were also all localized to the X and Y chromosomes of *S. salvinii*, and their locations and orders completely matched those of *S. triporcatus* (Figures S3 and S4). The hybridization efficiency ranged from 23% to 38% for 25–30 metaphase spreads.

### Discussion

The origin and evolutionary process of the X and Y sex chromosomes of *S. triporcatus* and *S. salvinii* were investigated using cross-species chromosome painting and chromosome mapping of cDNA clones of sex-linked genes isolated from *S. triporcatus*. Cross-species chromosome painting revealed that the X and Y chromosomes of *S. triporcatus* are homologous to *P. sinensis* chromosome 6, which corresponds to the chicken Z chromosome [24,25]. The homology with the chicken Z chromosome has been also reported for the red-eared slider (*Trachemys scripta elegans*) chromosome 6 and Nile crocodile (*Crocodylus niloticus*) chromosome 6 [28]; however, the homology of these chromosomes with *P. sinensis* chromosome 6 is still not known.

*S. triporcatus* homologs of 16 chicken Z-linked genes were all shown to be localized to the long arm of the X and Y chromosomes of *S. triporcatus* and *S. salvinii* in the same order.



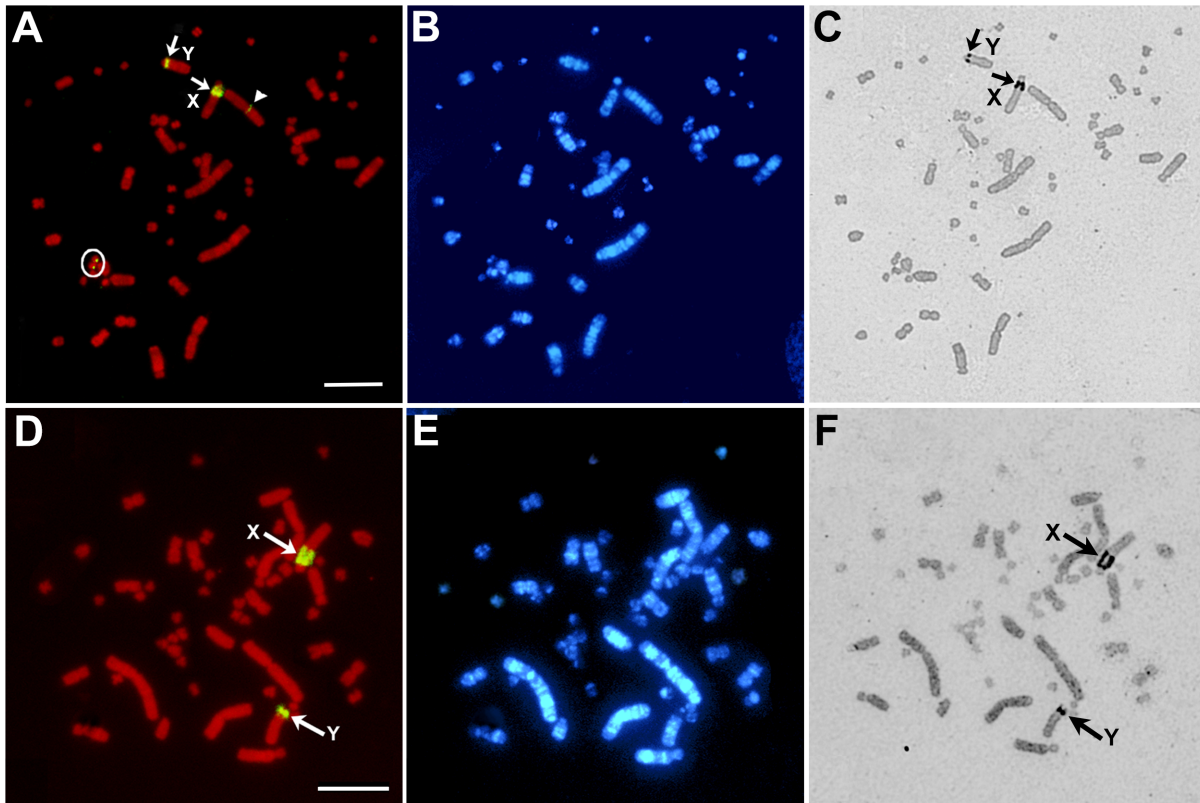

**Figure 3. Chromosomal distribution of the 18S-28S rRNA genes and NORs on metaphase spreads of male *S. triporcatus* and *S. salvinii*.** (A–C) *S. triporcatus*. (D–F) *S. salvinii*. FISH signals of the 18S–28S rRNA genes were localized to the secondary constrictions of the X and Y chromosomes (indicated by arrows), one of the copies of chromosome 2 (an arrowhead), and a pair of microchromosomes (a circle) in *S. triporcatus* (A), and the secondary constrictions of the X and Y chromosomes in *S. salvinii* (D). Ag-stained NORs were also distributed in the secondary constrictions of the X and Y chromosomes in *S. triporcatus* (C) and *S. salvinii* (F). However, no NORs were detected on chromosome 2 and a pair of microchromosomes in *S. triporcatus*, where the FISH signals of the rRNA genes were detected. (B, E) Hoechst-stained patterns of the same PI-stained metaphase spreads (A) and (D), respectively. Scale bars = 10  $\mu$ m.  
doi:10.1371/journal.pone.0105315.g003

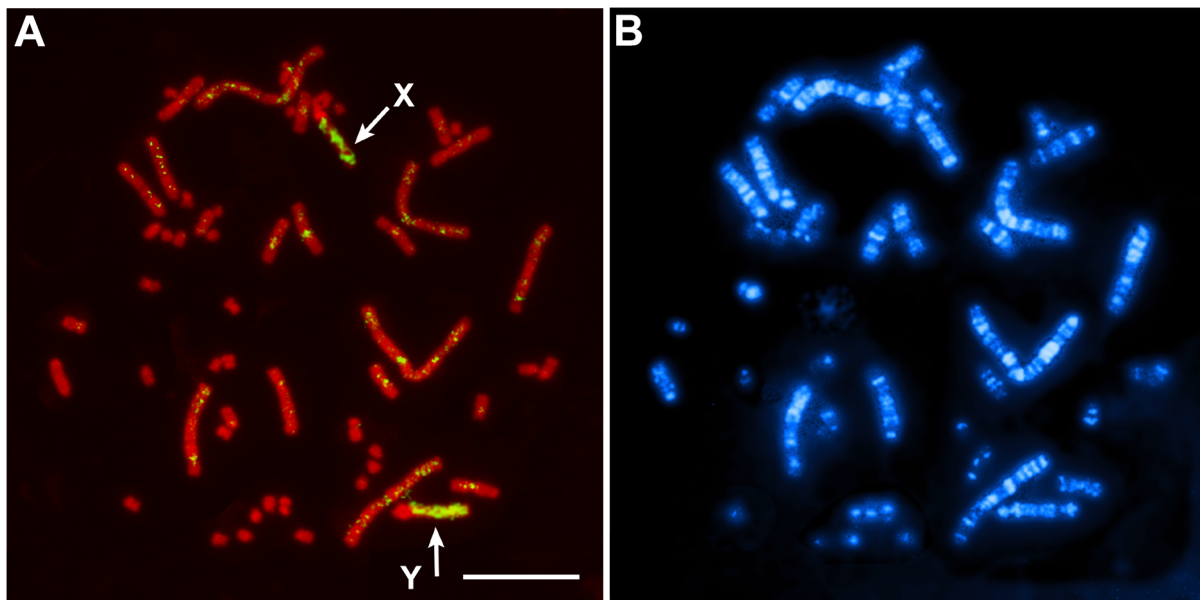

**Figure 4. Chromosome painting with chromosome 6-specific DNA probe of *P. sinensis* to metaphase spread of male *S. triporcatus*.** (A) The probe painted the X and Y chromosomes on PI-stained metaphase spread of *S. triporcatus* (indicated by arrows). (B) Hoechst-stained pattern of the same metaphase spread as in (A). Scale bar = 10  $\mu$ m.  
doi:10.1371/journal.pone.0105315.g004

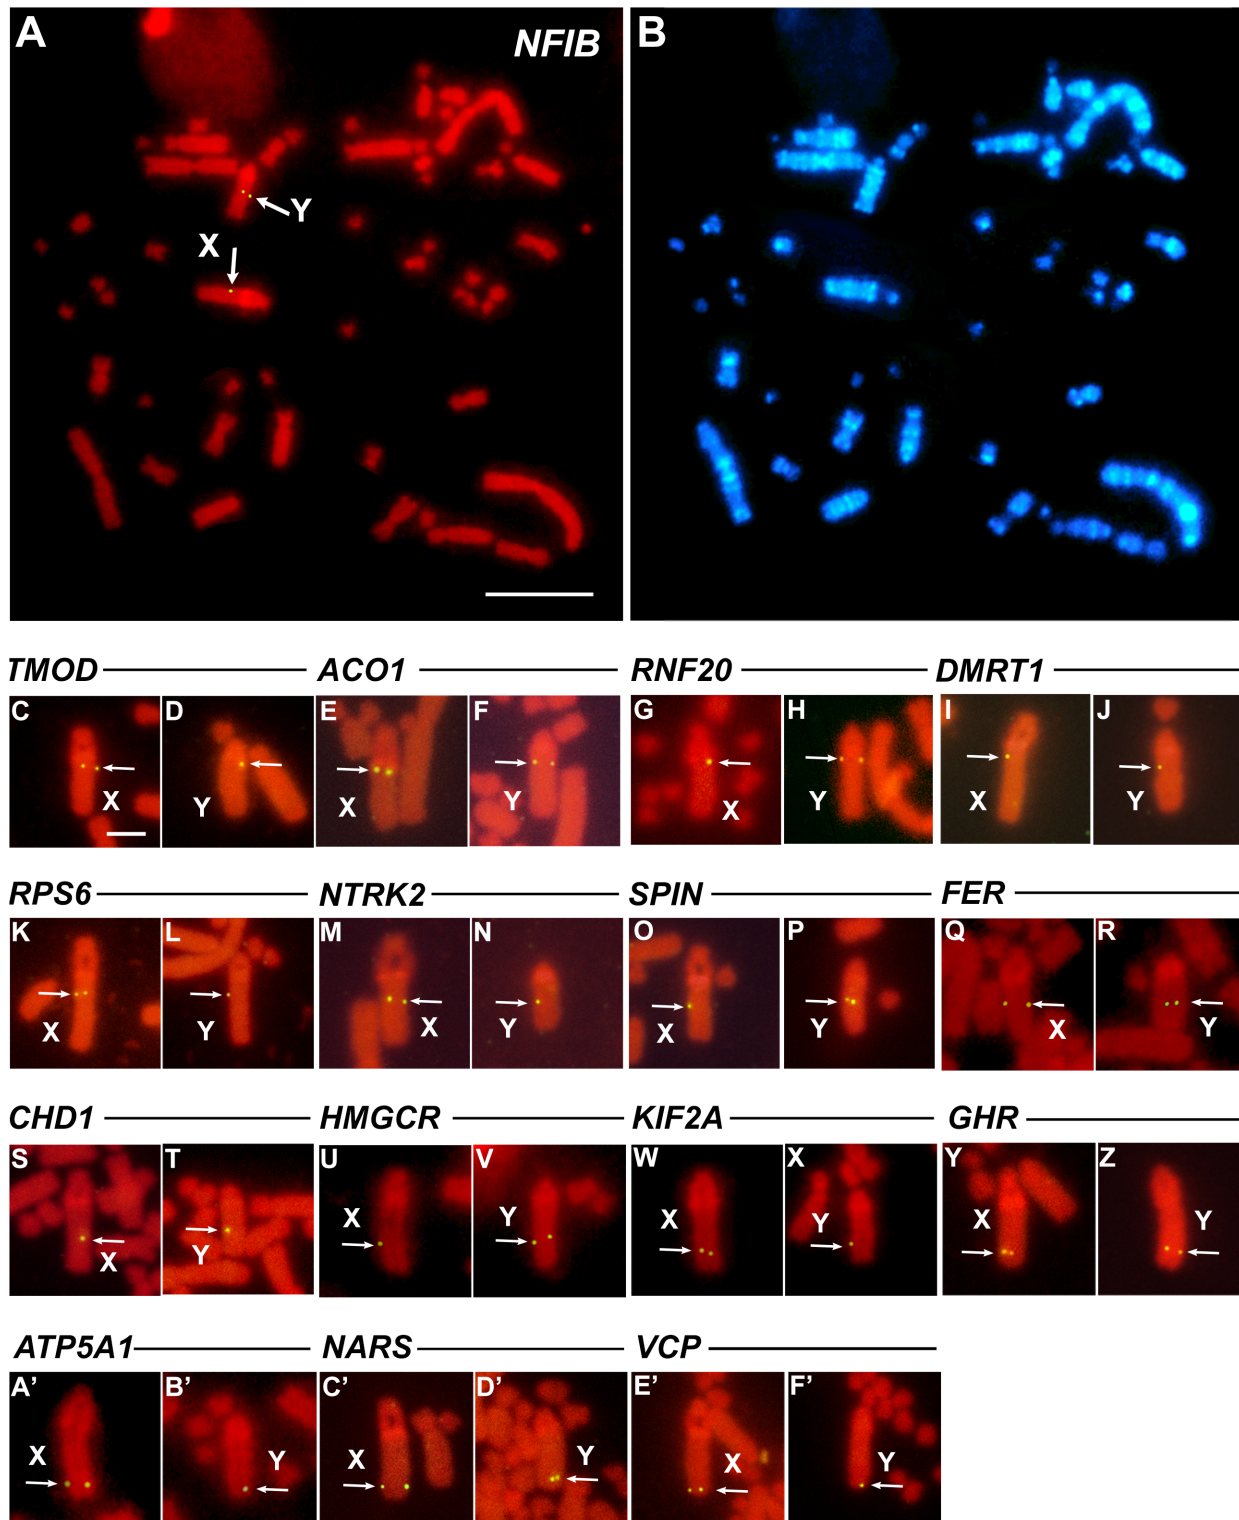

**Figure 5. Chromosomal locations of *S. triporcatus* homologs of 16 chicken Z-linked genes in male *S. triporcatus*.** (A, B) FISH pattern of *NFIB* on PI-stained metaphase spread (A) and Hoechst-stained pattern of the same metaphase spread (B). (C–Z, A'–F') FISH signals of *TMOD* (C, D), *ACO1* (E, F), *RNF20* (G, H), *DMRT1* (I, J), *RPS6* (K, L), *NTRK2* (M, N), *SPIN* (O, P), *FER* (Q, R), *CHD1* (S, T), *HMGCR* (U, V), *KIF2A* (W, X), *GHR* (Y, Z), *ATP5A1* (A', B'), *NARS* (C', D'), and *VCP* (E', F') on PI-stained X and Y chromosomes. Arrows indicate the hybridization signals of the genes. Scale bars represent 10  $\mu\text{m}$  (A, B) and 2.5  $\mu\text{m}$  (C–Z, A'–F').

doi:10.1371/journal.pone.0105315.g005

These results suggest that the XY sex chromosomes of *Staurotypus* turtles share the same origin as avian ZW sex chromosomes;

however; *Staurotypus* turtles and birds acquired different types of heterogametic sex-determination system during their evolution,

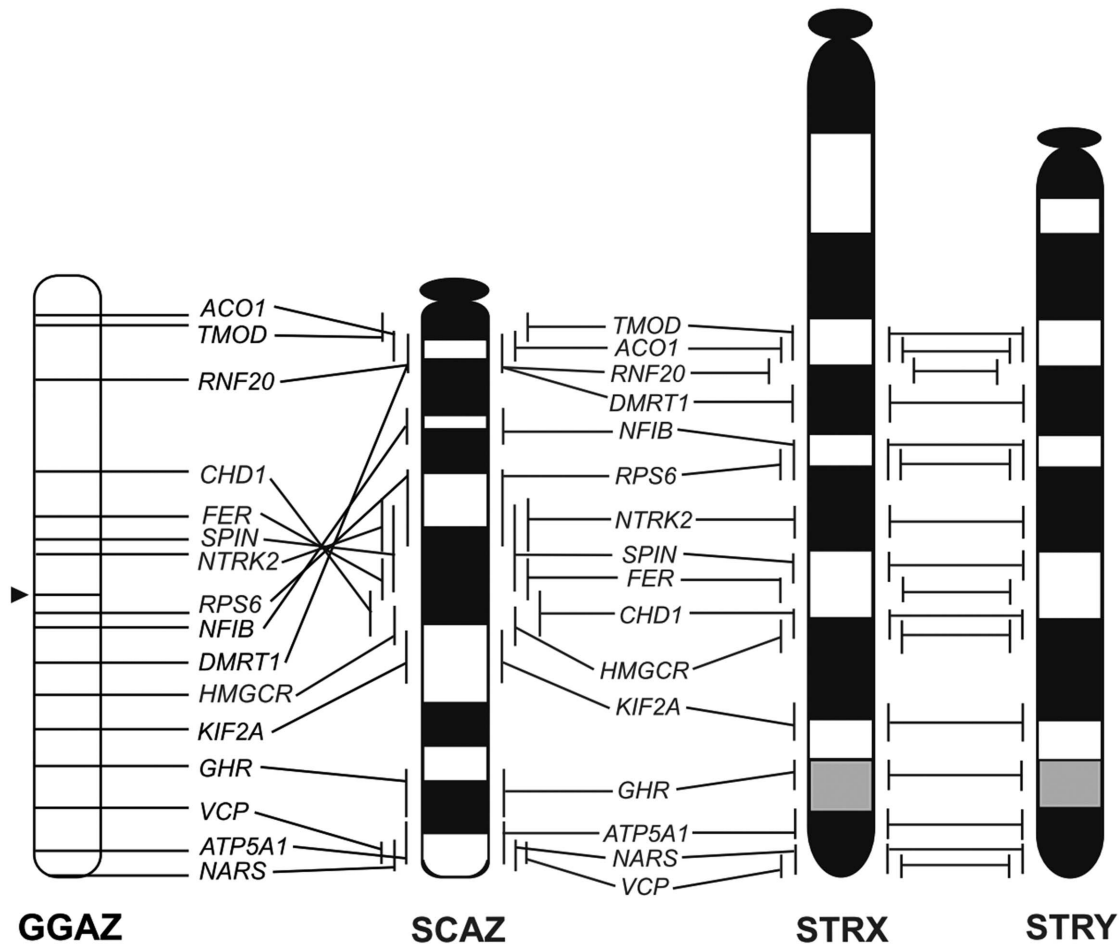

**Figure 6. Comparative cytogenetic maps of 16 functional genes on the chicken Z chromosome (GGAZ), the ostrich Z chromosome (SCAZ), and the X and Y chromosomes of *S. triporcatus* (STRX and STRY, respectively).** The gene order of 16 genes on the chicken Z chromosome was taken from the Ensembl Chicken Genome Browser ([http://www.ensembl.org/Gallus\\_gallus](http://www.ensembl.org/Gallus_gallus)). The chicken Z chromosome is inverted to facilitate comparison of the gene order. Arrowhead represents the location of the centromere. doi:10.1371/journal.pone.0105315.g006

and the X and Y chromosomes of *S. triporcatus* and *S. salvinii* are at a very early stage of differentiation. The only structural difference between the X and Y chromosomes in *S. triporcatus* was in the vicinity of the secondary constriction near the centromere, where meiotic recombination would have been suppressed. In *S. salvinii*, in addition to the difference in the size of the secondary constriction, the X and Y chromosomes were morphologically different: the X was subtelocentric, whereas the Y was acrocentric. The cessation of meiotic recombination very likely accounts for the difference in the copy number of the 18S–28S rRNA genes: this might have resulted from either a decrease in the copy number on the Y chromosome and/or amplification on the X chromosome. Alternatively, Sites et al. [17] suggested that the *S. salvinii* X chromosome was evolutionarily derived from the translocation of the NOR followed by the addition of a heterochromatic short arm onto the X, which occurred in one of the homomorphic proto-sex chromosomes, and the Y has remained unchanged. However, the initial step of sex chromosome differentiation in *Staurotypos* turtles remains unknown because the morphology of the homomorphic proto-sex chromosomes has not yet been identified.

The order of 16 genes on the *S. triporcatus* X chromosome was nearly identical to that of the ostrich Z chromosome, which bears the primitive gene order of avian sex chromosomes [27,29]

(Figure 6). This result suggests that the X chromosomes of *S. triporcatus* and *S. salvinii* and the ostrich Z chromosome are derived from the same autosomal pair of the common ancestor, and that the primitive gene order has been retained in both lineages independently since the time when Archosauromorpha diverged from the common ancestor of sauropsids 250–270 MYA [13–15]. In the chicken Z chromosome, the order was inverted in a region across the centromere, where seven genes (*DMRT1*, *NFIB*, *RPS6*, *NTRK2*, *SPIN*, *FER*, and *CHD1*) are contained, compared with those in the ostrich Z chromosome and the X chromosomes of two *Staurotypos* species. Moreover, the order of *DMRT1*–*NFIB*–*RPS6*–*NTRK2*–*SPIN*–*FER*–*CHD1* is probably the same as those of the ostrich Z and *Staurotypos* X chromosomes, although the location of the centromere differed (Figure 6). This result leads us to predict that a large paracentric inversion occurred at the breakpoints between *RNF20* and *DMRT1* and between *CHD1* and *HMGCR* in the ancestral acrocentric Z chromosome, and that subsequent repositioning of the centromere led to the metacentric chicken Z chromosome. Our previous studies revealed that whereas the ZW sex chromosomes of *P. sinensis* have homology with chicken chromosome 15, the XY chromosomes of *S. crassicolis* are homologous to chicken chromosome 5 [11,12]. These results indicate that the sex chromosomes of these three turtle species

**Table 1.** The cDNA fragments of *S. triporcatus* (STR) homologs of chicken Z-linked genes and nucleotide sequence identities between *S. triporcatus* and chicken (*Gallus gallus*, GGA) cDNA fragments.

| Gene <sup>a</sup> | Length of cDNA fragment (bp) | Identity (%) between STR and GGA <sup>b</sup> | Accession number of <i>S. triporcatus</i> homolog |
|-------------------|------------------------------|-----------------------------------------------|---------------------------------------------------|
| <i>ACO1</i>       | 1135                         | 83.1 (943/1135)                               | AB747261                                          |
| <i>ATP5A1</i>     | 1102                         | 86.8 (956/1102)                               | AB747262, AB747263                                |
| <i>CHD1</i>       | 893                          | 88.8 (793/893)                                | AB747264                                          |
| <i>DMRT1</i>      | 684                          | 81.2 (553/681)                                | AB747265                                          |
| <i>FER</i>        | 760                          | 91.4 (695/760)                                | AB747266                                          |
| <i>GHR</i>        | 898                          | 77.7 (698/898)                                | AB747267                                          |
| <i>HMGCR</i>      | 1077                         | 84.4 (909/1077)                               | AB747268                                          |
| <i>KIF2A</i>      | 664                          | 93.2 (619/664)                                | AB747269                                          |
| <i>NARS</i>       | 1083                         | 85.0 (921/1083)                               | AB747271                                          |
| <i>NFIB</i>       | 820                          | 94.4 (774/820)                                | AB747272                                          |
| <i>NTRK2</i>      | 554                          | 89.7 (497/554)                                | AB747273                                          |
| <i>RNF20</i>      | 1159                         | 84.9 (984/1159)                               | AB747274                                          |
| <i>RPS6</i>       | 658                          | 86.4 (569/658)                                | AB747275                                          |
| <i>SPIN</i>       | 628                          | 93.3 (586/628)                                | AB747276                                          |
| <i>TMOD</i>       | 1007                         | 82.2 (828/1007)                               | AB747277                                          |
| <i>VCP</i>        | 995                          | 90.1 (897/995)                                | AB747278                                          |

<sup>a</sup>*ACO1*, aconitase 1, soluble; *ATP5A1*, ATP synthase, H<sup>+</sup> transporting, mitochondrial F1 complex, alpha subunit, isoform 1, cardiac muscle; *CHD1*, chromodomain helicase DNA binding protein 1; *DMRT1*, *doublesex* and *mab-3* related transcription factor 1; *FER*, (fps/fes related) tyrosine kinase; *GHR*, growth hormone receptor; *HMGCR*, 3-hydroxy-3-methylglutaryl-CoA reductase; *KIF2A*, kinesin heavy chain member 2A; *NARS*, asparaginyl-tRNA synthetase; *NFIB*, nuclear factor I/B; *NTRK2*, neurotrophic tyrosine kinase receptor, type 2; *RNF20*, ring finger protein 20, E3 ubiquitin protein ligase; *RPS6*, ribosomal protein S6; *SPIN*, spindlin; *TMOD*, tropomodulin 1; *VCP*, valosin containing protein.

<sup>b</sup>The number in parenthesis indicates the number of identical bases/the number of bases in the overlapped region between cDNA fragments of two species. doi:10.1371/journal.pone.0105315.t001

differentiated independently from different autosomal pairs of the common ancestor in each lineage. This suggests great diversity of sex chromosomal origins and a considerable level of plasticity of sex determination in Testudines. Such diversity of sex chromosomal origins within the same order has also been found in squamate reptiles [22,30–33]. The homology of the micro-X sex chromosome of the green anole lizard (*Anolis carolinensis*) to chicken chromosome 15 [31] indicates that *A. carolinensis* and *P. sinensis* happen to share the same origin of sex chromosomes. However, it remains unclear whether the gene order of the sex chromosomes has been conserved.

The family Kinosternidae is composed of two subfamilies, Staurotypinae and Kinosterninae [34]; however, molecular phylogenetic analysis has indicated that these two clades show monophyly within the family [35]. Staurotypinae comprises only three species: the narrow-bridged musk turtle (*Claudius angustatus*), *S. triporcatus*, and *S. salvinii*. These three species have similar karyotypes with 2n = 54. *C. angustatus* also exhibits GSD; however, this species has no heteromorphic sex chromosomes [16,36]. The karyotypes of Kinosterninae species differ from those of Staurotypinae in terms of the diploid chromosome number (2n = 56), and no GSD species have been reported in this subfamily [2,16,37]. These observations collectively suggest that TSD was probably the primitive state in Kinosternidae and that GSD arose in the lineage of Staurotypinae; it thus seems likely that *Staurotypus* and *Claudius* share the ancestral XY sex chromosome system for this group but that *Claudius* remains at a more primitive stage of differentiation or that *Claudius* sex chromosomes are more recently derived than those in *Staurotypus*. The level of homology of the sex chromosomes between *C. angustatus* and the other two *Staurotypus* species remains unknown;

therefore, identification of the *C. angustatus* sex chromosomes and their linkage groups are needed to clarify the ancestral form of sex chromosomes and the initial step of sex chromosome differentiation in Staurotypinae.

*S. triporcatus* and *S. salvinii* are the second case of reptilian species for which sex chromosomes were found to have the same origin as the avian Z sex chromosome. The first case is the Hokou gecko (*Gekko hokouensis*), in which six chicken Z-linked genes (*ACO1*, *ATP5A1*, *CHD1*, *DMRT1*, *GHR*, and *RPS6*) were all mapped to the Z chromosome in the same order as that of the ostrich Z chromosome [22,27]. In *G. hokouensis*, the W homolog of *DMRT1* was located in the pericentromeric region where multiple rearrangements including a pericentric inversion occurred. Consequently, recombination should have been suppressed between the Z and W chromosomes. This suggests that functional divergence may have occurred in the W homolog. *DMRT1* is a strong candidate of the sex-determining gene in birds, which is deleted in the chicken W chromosome and also in the W chromosomes of paleognathous birds, emu (*Dromaius novaehollandiae*), double-wattled cassowary (*Casuarus casuaris*), and ostrich [18,38], and is considered to be involved in testis determination by twofold gene dosage in ZZ males [39,40]. By contrast, in the African clawed frog (*Xenopus laevis*), a paralog of *DMRT1* located only on the W chromosome, *DM-W*, was identified as the ovary-determinant gene [41]. In *S. triporcatus* and *S. salvinii*, the X and Y homologs of *DMRT1* were mapped near the secondary constrictions where the X and Y chromosomes might be structurally differentiated. However, the male-specific region on the Y chromosome, which is involved in male sex determination, is still unknown because no intra-chromosomal rearrangement, partial deletion of the Y chromosome, and/or



**Table 2.** The cDNA fragments of ostrich (*S. camelus*, SCA) homologs of chicken Z-linked genes and nucleotide sequence identities among *S. triporcatus* (STR), ostrich and chicken (*Gallus gallus*, GGA) cDNA fragments.

| Gene <sup>a</sup> | Length of cDNA fragment (bp) | Identity (%) between STR and SCA <sup>b</sup> | Identity (%) between SCA and GGA <sup>b</sup> | Accession number of ostrich homolog           |
|-------------------|------------------------------|-----------------------------------------------|-----------------------------------------------|-----------------------------------------------|
| <i>ACO1</i>       | 1133                         | 83.6 (948/1133)                               | 91.7 (1039/1133)                              | AB755561                                      |
| <i>ATP5A1</i>     | 990                          | 88.1 (873/990)                                | 92.5 (916/990)                                | AB254864 <sup>c</sup> , AB254866 <sup>c</sup> |
| <i>CHD1</i>       | 874                          | 89.4 (780/872)                                | 92.1 (805/874)                                | AB254867 <sup>c</sup>                         |
| <i>DMRT1</i>      | 1262                         | 87.1 (420/482)                                | 88.3 (575/651)                                | AB536738 <sup>d</sup>                         |
| <i>FER</i>        | 761                          | 92.5 (703/760)                                | 94.3 (718/761)                                | AB747279                                      |
| <i>GHR</i>        | 832                          | 79.6 (653/820)                                | 86.8 (712/820)                                | AB254871 <sup>c</sup>                         |
| <i>HMGCR</i>      | 1074                         | 85.7 (920/1074)                               | 91.6 (984/1074)                               | AB747280                                      |
| <i>KIF2A</i>      | 666                          | 93.8 (623/664)                                | 95.8 (637/665)                                | AB747281                                      |
| <i>NARS</i>       | 1085                         | 86.0 (931/1083)                               | 91.7 (994/1084)                               | AB747283                                      |
| <i>NFIB</i>       | 820                          | 94.4 (774/820)                                | 95.2 (781/820)                                | AB747284                                      |
| <i>NTRK2</i>      | 500                          | 90.8 (454/500)                                | 94.8 (474/500)                                | AB254873 <sup>c</sup>                         |
| <i>RNF20</i>      | 1171                         | 86.4 (999/1156)                               | 91.8 (1076/1171)                              | AB747285                                      |
| <i>RPS6</i>       | 612                          | 87.3 (534/612)                                | 93.8 (574/612)                                | AB254876 <sup>c</sup>                         |
| <i>SPIN</i>       | 580                          | 94.3 (547/580)                                | 97.8 (567/580)                                | AB254878 <sup>c</sup>                         |
| <i>TMOD</i>       | 901                          | 83.9 (756/901)                                | 90.1 (812/901)                                | AB254879 <sup>c</sup>                         |
| <i>VCP</i>        | 995                          | 90.0 (896/995)                                | 93.4 (929/995)                                | AB747356                                      |

<sup>a</sup>*ACO1*, aconitase 1, soluble; *ATP5A1*, ATP synthase, H<sup>+</sup> transporting, mitochondrial F1 complex, alpha subunit, isoform 1, cardiac muscle; *CHD1*, chromodomain helicase DNA binding protein 1; *DMRT1*, *doublesex* and *mab-3* related transcription factor 1; *FER*, (fps/fes related) tyrosine kinase; *GHR*, growth hormone receptor; *HMGCR*, 3-hydroxy-3-methylglutaryl-CoA reductase; *KIF2A*, kinesin heavy chain member 2A; *NARS*, asparaginyl-tRNA synthetase; *NFIB*, nuclear factor I/B; *NTRK2*, neurotrophic tyrosine kinase receptor, type 2; *RNF20*, ring finger protein 20, E3 ubiquitin protein ligase; *RPS6*, ribosomal protein S6; *SPIN*, spindlin; *TMOD*, tropomodulin 1; *VCP*, valosin containing protein.

<sup>b</sup>The number in parenthesis indicates the number of identical bases/the number of bases in the overlapped region between cDNA fragments of two species.

<sup>c</sup>The nucleotide sequences were obtained from Tsuda et al. [27].

<sup>d</sup>The nucleotide sequence was obtained from Ishijima et al. [18].

doi:10.1371/journal.pone.0105315.t002

structurally differentiated Y-linked gene has yet been found. Hence, another molecular cytogenetic approach is needed to identify the critical sex-determining region in these species.

## Supporting Information

### Figure S1 Chromosomal locations of ostrich homologs of nine chicken Z-linked genes in female ostrich.

(A, B) FISH pattern of *NARS* on PI-stained metaphase spread (A) and Hoechst-stained pattern of the same metaphase spread (B). (C–N) FISH signals of *ACO1* (C), *RNF20* (D), *DMRT1* (E), *NFIB* (F), *FER* (G), *HMGCR* (I), *KIF2A* (K), and *VCP* (M) on PI-stained Z chromosomes, and FISH signals of *FER* (H), *HMGCR* (J), *KIF2A* (L), and *VCP* (N) on PI-stained W chromosomes. No signals of *ACO1*, *RNF20*, *DMRT1*, and *NFIB* were detected on the W chromosomes. Arrows indicate the hybridization signals of the genes. Scale bars represent 10 μm (A, B) and 2.5 μm (C–N). (PDF)

### Figure S2 Comparative cytogenetic maps of 16 functional genes on the Z chromosome (SCAZ) and W chromosome (SCAW) of the ostrich (*S. camelus*, SCA).

The chromosomal locations of seven genes (*TMOD*, *RPS6*, *NTRK2*, *SPIN*, *CHD1*, *GHR*, and *ATP5A1*) written in red were taken from our previous report [27]. (PDF)

### Figure S3 Chromosomal locations of *S. salvinii* homologs of 16 chicken Z-linked genes in male *S. salvinii*.

(A, B) FISH pattern of *VCP* on PI-stained metaphase spread (A) and Hoechst-stained pattern of the same metaphase spread (B). (C–Z,

A'–E') FISH signals of *TMOD* (C, D), *ACO1* (E, F), *RNF20* (G, H), *DMRT1* (I, J), *NFIB* (K, L), *RPS6* (M, N), *NTRK2* (O, P), *SPIN* (Q, R), *FER* (S, T), *CHD1* (U), *HMGCR* (V, W), *KIF2A* (X, Y), *GHR* (Z, A'), *ATP5A1* (B', C'), and *NARS* (D', E') on PI-stained X and Y chromosomes. Arrows indicate the hybridization signals of the genes. Scale bars represent 10 μm (A, B) and 2.5 μm (C–Z, A'–E'). (PDF)

### Figure S4 Comparative cytogenetic maps of 16 functional genes on the X and Y chromosomes of *S. triporcatus* (STRX and STRY) and *S. salvinii* (SSAX and SSAY).

(PDF)

### Table S1 Degenerate oligonucleotide primers used for molecular cloning of *S. triporcatus* homologs of 16 chicken Z-linked genes.

(XLS)

## Acknowledgments

We are grateful to Fengtang Yang and Patricia O'Brien (both from the Department of Veterinary Medicine, Cambridge University, UK) for providing chromosome-specific DNA probes of *P. sinensis*.

## Author Contributions

Conceived and designed the experiments: TK YM. Performed the experiments: TK YU CN. Analyzed the data: TK YU CN YM. Contributed reagents/materials/analysis tools: TK CN. Contributed to the writing of the manuscript: TK YM.

## References

- Valenzuela N, Lance V (eds.) (2004) Temperature-dependent sex determination in vertebrates. Washington: Smithsonian Books.
- Olmo E, Signorino G (2005) Chromorep: a reptile chromosomes database. Available: <http://chromorep.univpm.it/>.
- Ezaz T, Sarre SD, O'Meally D, Graves JAM, Georges A (2009) Sex chromosome evolution in lizards: independent origins and rapid transitions. *Cytogenet Genome Res* 127: 249–260.
- Janzen FJ, Phillips PC (2006) Exploring the evolution of environmental sex determination, especially in reptiles. *J Evol Biol* 19: 1775–1784.
- Organ CL, Janes DE (2008) Evolution of sex chromosomes in Saurapsida. *Integr Comp Biol* 48: 512–519.
- Pokorná M, Kratochvíl L (2009) Phylogeny of sex-determining mechanisms in squamate reptiles: are sex chromosomes an evolutionary trap? *Zool J Linn Soc* 156: 168–183.
- Badenhorst D, Stanyon R, Engstrom T, Valenzuela N (2013) A ZZ/ZW microchromosome system in the spiny softshell turtle, *Apalone spinifer*, reveals an intriguing sex chromosome conservation in Trionychidae. *Chromosome Res* 21: 137–147.
- Ezaz T, Valenzuela N, Grützner F, Miura I, Georges A, et al. (2006) An XX/XY sex microchromosome system in a freshwater turtle, *Chelodina longicollis* (Testudines: Chelidae) with genetic sex determination. *Chromosome Res* 14: 139–150.
- Martínez PA, Ezaz T, Valenzuela N, Georges A, Graves JAM (2008) An XX/XY heteromorphic sex chromosome system in the Australian chelid turtle *Emydura macquarii*: a new piece in the puzzle of sex chromosome evolution in turtles. *Chromosome Res* 16: 815–825.
- Kawai A, Nishida-Umehara C, Ishijima J, Tsuda Y, Ota H, et al. (2007) Different origins of bird and reptile sex chromosomes inferred from comparative mapping of chicken Z-linked genes. *Cytogenet Genome Res* 117: 92–102.
- Kawagoshi T, Uno Y, Matsubara K, Matsuda Y, Nishida C (2009) The ZW micro-sex chromosomes of the Chinese soft-shelled turtle (*Pelodiscus sinensis*, Trionychidae, Testudines) have the same origin as chicken chromosome 15. *Cytogenet Genome Res* 125: 125–31.
- Kawagoshi T, Nishida C, Matsuda Y (2012) The origin and differentiation process of X and Y chromosomes of the black marsh turtle (*Siebenrockiella crassicollis*, Geomydidae, Testudines). *Chromosome Res* 20: 95–110.
- Kumazawa Y, Nishida M (1999) Complete mitochondrial DNA sequences of the green turtle and blue-tailed mole skink: statistical evidence for Archosaurian affinity of turtles. *Mol Biol Evol* 16: 784–792.
- Rest JS, Ast JC, Austin CC, Waddell PJ, Tibbetts EA, et al. (2003) Molecular systematics of primary reptilian lineages and the tuatara mitochondrial genome. *Mol Phylogenet Evol* 29: 289–297.
- Wang Z, Pascual-Anaya J, Zadissa A, Li W, Niimura Y, et al. (2013) The draft genomes of soft-shell turtle and green sea turtle yield insights into the development and evolution of the turtle-specific body plan. *Nat Genet* 45: 701–706.
- Bull JJ, Moon RG, Legler JM (1974) Male heterogamety in kinosternid turtles (genus *Staurotypus*). *Cytogenet Cell Genet* 13: 419–425.
- Sites JW Jr, Bickham JW, Haiduk MW (1979) Derived X chromosome in the turtle genus *Staurotypus*. *Science* 206: 1410–1412.
- Ishijima J, Uno Y, Nishida C, Matsuda Y (2014) Genomic structures of the kW1 loci on the Z and W chromosomes in ratite birds: structural changes at an early stage of W chromosome differentiation. *Cytogenet Genome Res* 142: 255–267.
- Matsuda Y, Chapman VM (1995) Application of fluorescence *in situ* hybridization in genome analysis of the mouse. *Electrophoresis* 16: 261–272.
- Sumner AT (1972) A simple technique for demonstrating centromeric heterochromatin. *Exp Cell Res* 75: 304–306.
- Matsubara K, Nishida-Umehara C, Kuroiwa A, Tsuchiya K, Matsuda Y (2003) Identification of chromosome rearrangements between the laboratory mouse (*Mus musculus*) and the Indian spiny mouse (*Mus platythrix*) by comparative FISH analysis. *Chromosome Res* 11: 57–64.
- Kawai A, Ishijima J, Nishida C, Kosaka A, Ota H, et al. (2009) The ZW sex chromosomes of *Gekko hokouensis* (Gekkonidae, Squamata) represent highly conserved homology with those of avian species. *Chromosoma* 118: 43–51.
- Howell WM, Black DA (1980) Controlled silver-staining of nucleolus organizer regions with a protective colloidal developer: a 1-step method. *Experientia* 36: 1014–1015.
- Matsuda Y, Nishida-Umehara C, Tarui H, Kuroiwa A, Yamada K, et al. (2005) Highly conserved linkage homology between birds and turtles: Birds and turtle chromosomes are precise counterparts of each other. *Chromosome Res* 13: 601–615.
- Uno Y, Nishida C, Tarui H, Ishishita S, Takagi C, et al. (2012) Inference of the protokaryotypes of amniotes and tetrapods and the evolutionary processes of microchromosomes from comparative gene mapping. *PLoS One* 7: e53027.
- Ogawa A, Murata K, Mizuno S (1998) The location of Z- and W-linked marker genes and sequence on the homomorphic sex chromosomes of the ostrich and the emu. *Proc Natl Acad Sci USA* 95: 4415–4418.
- Tsuda Y, Nishida-Umehara C, Ishijima J, Yamada K, Matsuda Y (2007) Comparison of the Z and W sex chromosomal architectures in elegant crested tinamou (*Eudromia elegans*) and ostrich (*Struthio camelus*) and the process of sex chromosome differentiation in palaeognathous birds. *Chromosoma* 116: 159–173.
- Kasai F, O'Brien PC, Martin S, Ferguson-Smith MA (2012) Extensive homology of chicken macrochromosomes in the karyotypes of *Trachemys scripta elegans* and *Crocodylus niloticus* revealed by chromosome painting despite long divergence times. *Cytogenet Genome Res* 136: 303–307.
- Nishida-Umehara C, Tsuda Y, Ishijima J, Ando J, Fujiwara A, et al. (2007) The molecular basis of chromosome orthologies and sex chromosomal differentiation in palaeognathous birds. *Chromosome Res* 15: 721–734.
- Matsubara K, Tarui H, Toriba M, Yamada K, Nishida-Umehara C, et al. (2006) Evidence for different origin of sex chromosomes in snakes, birds, and mammals and step-wise differentiation of snake sex chromosomes. *Proc Natl Acad Sci USA* 103: 18190–18195.
- Alföldi J, Di Palma F, Grabherr M, Williams C, Kong L, et al. (2011) The genome of the green anole lizard and a comparative analysis with birds and mammals. *Nature* 31: 587–591.
- O'Meally D, Ezaz T, Georges A, Sarre SD, Graves JAM (2012) Are some chromosomes particularly good at sex? Insights from amniotes. *Chromosome Res* 20: 7–19.
- Young MJ, O'Meally D, Sarre SD, Georges A, Ezaz T (2013). Molecular cytogenetic map of the central bearded dragon, *Pogona vitticeps* (Squamata: Agamidae). *Chromosome Res* 21: 361–374.
- Vitt LJ, Caldwell JP (2013) Herpetology: An introductory biology of amphibians and reptiles. Waltham: Academic Press, 776 p.
- Iverson JB, Le M, Ingram C (2013) Molecular phylogenetics of the mud and musk turtle family Kinosternidae. *Mol Phylogenet Evol* 69: 929–939.
- Vogt RC, Flores-Villela O (1992) Effects of incubation temperature on sex determination in a community of neotropical freshwater turtles in southern Mexico. *Herpetologica* 48: 265–270.
- Valenzuela N, Adams DC (2011) Chromosome number and sex determination coevolve in turtles. *Evolution* 65: 1808–1813.
- Shetty S, Kirby P, Zarkower D, Graves JAM (2002) DMRT1 in a ratite bird: evidence for a role in sex determination and discovery of a putative regulatory element. *Cytogenet Genome Res* 99: 245–251.
- Nanda I, Zend-Ajusich E, Shan Z, Grützner F, Schartl M, et al. (2000) Conserved synteny between the chicken Z sex chromosome and human chromosome 9 includes the male regulatory gene *DMRT1*: a comparative (re)view on avian sex determination. *Cytogenet Cell Genet* 89: 67–78.
- Smith CA, Roeszler KN, Ohnesorg T, Cummins DM, Farlie PG, et al. (2009) The avian Z-linked gene *DMRT1* is required for male sex determination in the chicken. *Nature* 461: 267–271.
- Yoshimoto S, Okada E, Umemoto H, Tamura K, Uno Y, et al. (2008) A W-linked DM-domain gene, DM-W, participates in primary ovary development in *Xenopus laevis*. *Proc Natl Acad Sci USA* 105: 2469–2474.
